# Supplementary material for: Structure of the human activated spliceosome in three conformational states
Source: PubMed Central journal article supplement (PMC5835773; doi:10.1038/cr.2018.14), 2018-01-23
Supplement: cr201814x2.pdf [file cr201814x2.pdf]

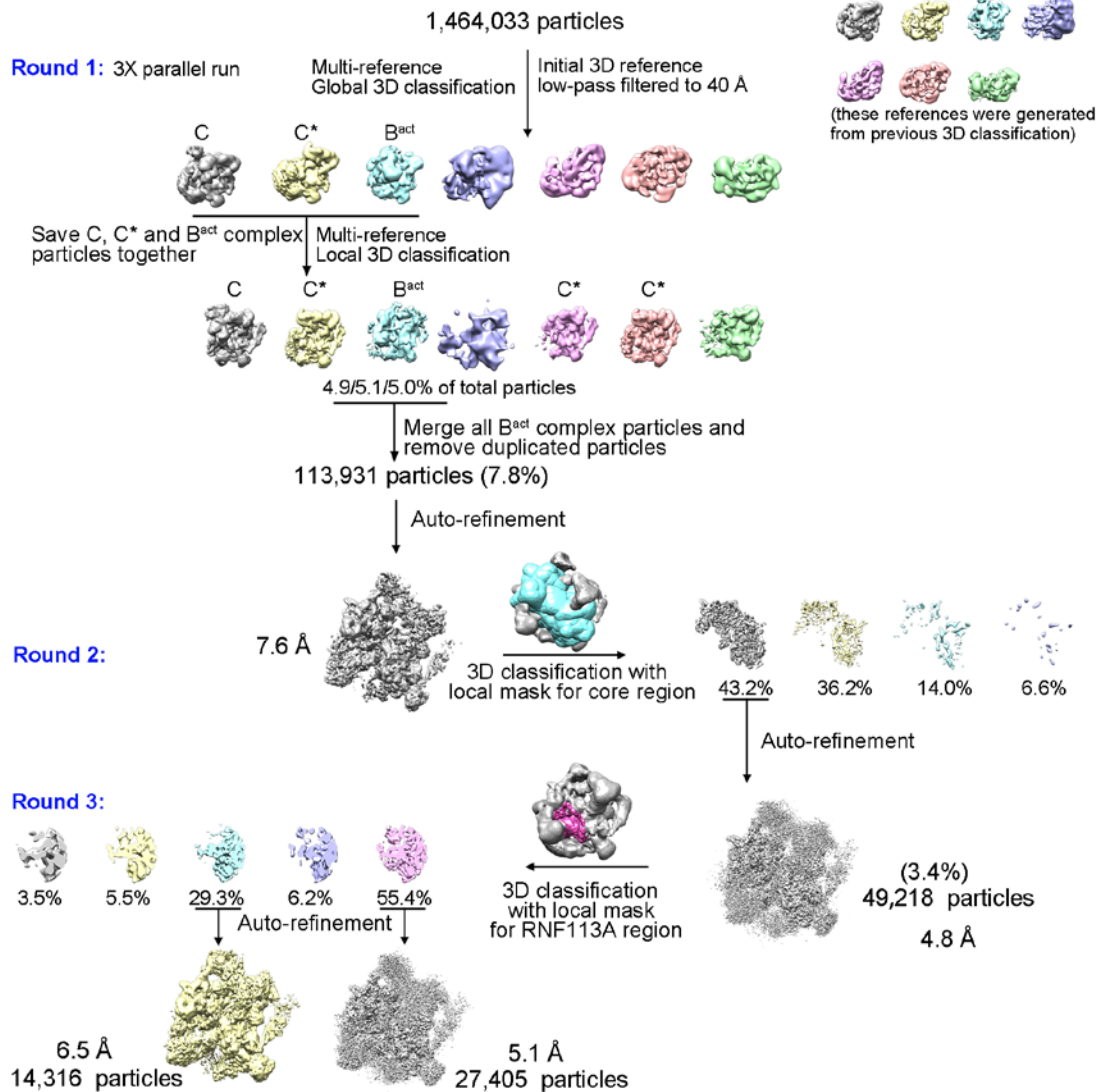

**Figure S2** Analysis of the data set I for the cryo-EM reconstruction of the human mature and late B<sup>act</sup> complexes. Shown here is a flow chart for the analysis of the data set I of 1,464,033 particles of the human spliceosomal complexes. There are three distinct spliceosomal complexes – the B<sup>act</sup>, C, and C\* – in the sample (sample I). The analysis focused on the particles that represent the B<sup>act</sup> complex. Please refer to Materials and Methods for details.
