# Supplementary material for: Structure of the human activated spliceosome in three conformational states
Source: PubMed Central journal article supplement (PMC5835773; doi:10.1038/cr.2018.14), 2018-01-23
Supplement: cr201814x8.pdf [file cr201814x8.pdf]

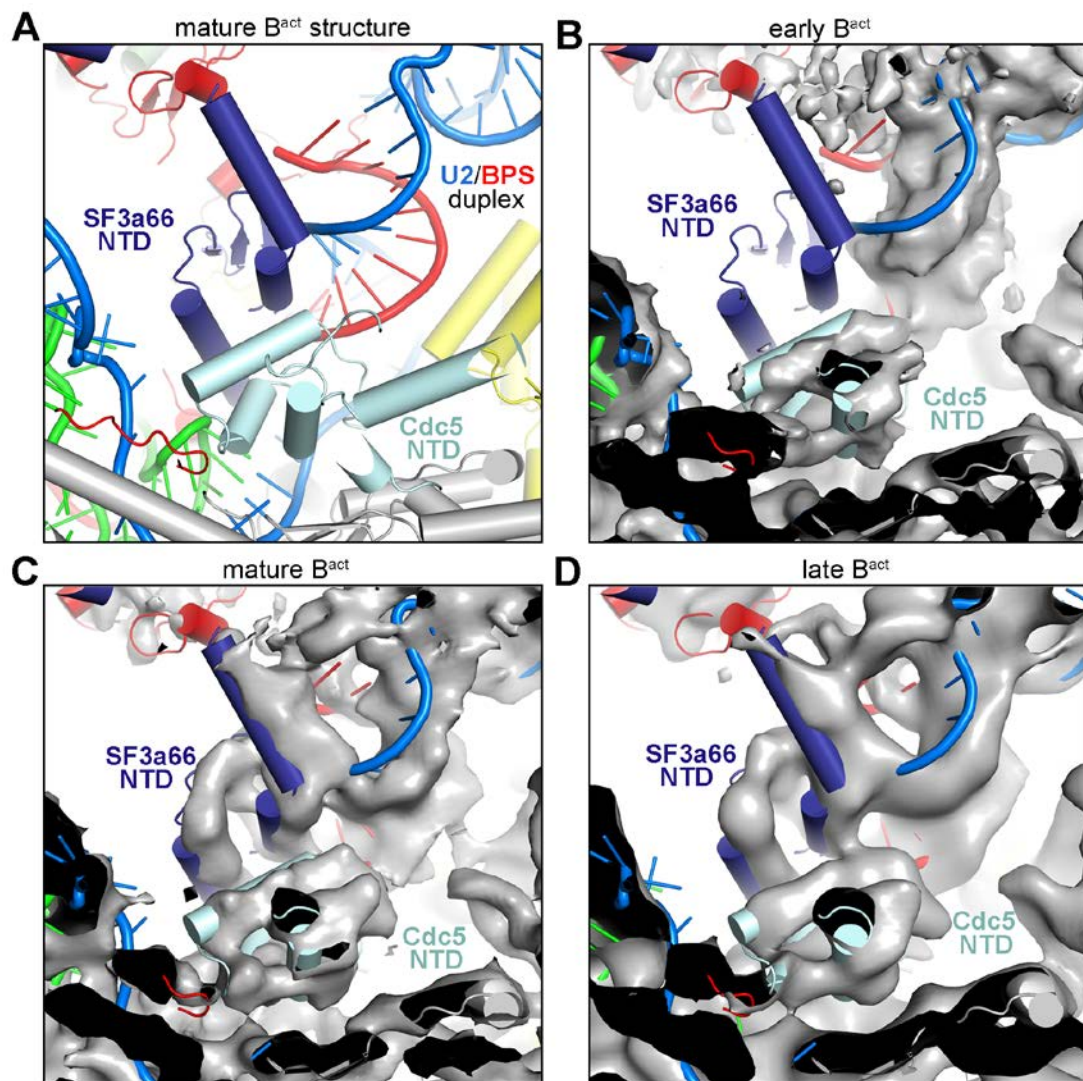

**Figure S8** The cryo-EM density map of the SF3a complex components SF3a66 in the early, mature, and late  $B^{\text{act}}$  complexes. **(A)** The structure of the N-terminal domain (NTD) of SF3a66 in the mature  $B^{\text{act}}$  complex. The NTD of SF3a66 is located close to the U2 snRNA/BPS duplex at the 5'-end of the BPS. **(B)** A section of the 4.9-Å resolution EM density map of the SF3a66 NTD in the early  $B^{\text{act}}$  complex. There is no obvious density for the NTD of SF3a66. **(C)** A section of the 5.1-Å resolution EM density map of the SF3a66 NTD in the mature  $B^{\text{act}}$  complex. Strong density is present for the NTD of SF3a66. The association of the NTD of SF3a66 with the U2 snRNA/BPS duplex may stabilize the interaction between the SF3a complex and the U2 snRNP core, thus indirectly bridging the interaction of the

U2 snRNP with the NTC proteins. **(D)** A section of the 6.5-Å resolution EM density map of the SF3a66 NTD in the late B<sup>act</sup> complex. The density for the NTD of SF3a66 is similarly strong as that in the mature B<sup>act</sup> complex.
