# Supplementary material for: Structure of the human activated spliceosome in three conformational states
Source: PubMed Central journal article supplement (PMC5835773; doi:10.1038/cr.2018.14), 2018-01-23
Supplement: cr201814x15.pdf [file cr201814x15.pdf]

**Table S2.** Summary of model building for the human spliceosomal B<sup>act</sup> complex.

|                                     | Molecule                                                        | State |        |      | Length      | Domain/Region               | PDB code  | Modeling | Resolution (Å) | Chain ID |
|-------------------------------------|-----------------------------------------------------------------|-------|--------|------|-------------|-----------------------------|-----------|----------|----------------|----------|
|                                     | Human/ <i>S.pombe</i> / <i>S.cere</i>                           | early | mature | late |             |                             |           |          |                |          |
| U5 snRNP                            | U5 snRNA                                                        | ✓     | ✓      | ✓    | 117         | 8:71/85:104                 |           | RD       | 4.0~5.0        | B        |
|                                     | Prp8/ <i>Spp42</i> / <i>Prp8</i>                                | ✓     | ✓      | ✓    | 2335        | 25:2335                     |           | RD       | 4.0~5.0        | A        |
|                                     | Snu114/ <i>Cwf10</i> / <i>Snu114</i>                            | ✓     | ✓      | ✓    | 972         | 54:943                      | 5XJC      | RD       | 4.0~5.0        | C        |
|                                     | Brr2                                                            | ✓     | ✓      | ✓    | 2136        | 404:2125                    |           | RD       | 4.0~9.0        | D        |
|                                     | U5-40K/ <i>Cwf17</i> /-                                         | ✓     | ✓      | ✓    | 357         | WD40 domain                 |           | RD       | 4.0~6.0        | E        |
|                                     | SmB,D1,D2,D3,E,F,G                                              | ✓     | ✓      | ✓    | -           | Sm fold                     |           | RD       | 6.0~15.0       | a-g      |
| U6 snRNP                            | U6 snRNA                                                        | ✓     | ✓      | ✓    | 107 nt      | 1:97                        | 5XJC      | RD       | 3.8~4.5        | F        |
| Pre-mRNA                            | Pre-mRNA                                                        | ✓     | ✓      | ✓    | -           | 59 nt                       | 5XJC      | RD       | 4.0~6.0        | G        |
| U2 snRNP                            | U2 RNA                                                          | ✓     | ✓      | ✓    | 188 nt      | 1:47/54:184                 | 5XJC      | RD       | 4.0~20.0       | H        |
|                                     | U2-A'/ <i>Lea1</i> / <i>Lea1</i>                                | ✓     | ✓      | ✓    | 255         | LRR domain                  | 1A9N      | RD       | 8.0~20.0       | o        |
|                                     | U2-B''/ <i>Msl1</i> / <i>Msl1</i>                               | ✓     | ✓      | ✓    | 225         | RRM domain                  | 1A9N      | RD       | 8.0~20.0       | p        |
|                                     | SmB,D1,D2,D3,E,F,G                                              | ✓     | ✓      | ✓    | -           | Sm fold                     | 4WZJ      | RD       | 8.0~20.0       | h-n      |
|                                     | SF3a120/ <i>Sap114</i> / <i>Prp21</i>                           | ✓     | ✓      | ✓    | 793         | SURP1/2,-                   |           | RD       | 20.0~30.0      | u        |
|                                     | SF3a66/ <i>Sap62</i> / <i>Prp11</i>                             | ✓     | ✓      | ✓    | 464         | ZF,-                        | 4DGW      | RD       | 20.0~30.0      | v        |
|                                     | SF3a60/ <i>Sap61</i> / <i>Prp9</i>                              | ✓     | ✓      | ✓    | 501         | -                           |           | RD       | 20.0~30.0      | w        |
|                                     | SF3b155/ <i>Sap155</i> / <i>Hsh155</i>                          | ✓     | ✓      | ✓    | 1307        | HEAT repeat                 | 5IFE      | RD       | 3.8~4.5        | 1        |
|                                     | SF3b145/ <i>Sap145</i> / <i>Cus1</i>                            | ✓     | ✓      | ✓    | 895         | -                           | 5GM6      | HM       | 3.8~4.5        | 2        |
|                                     | SF3b130/ <i>Sap130</i> / <i>Rse1</i>                            | ✓     | ✓      | ✓    | 1217        | WD40 domain I/II/III        | 5IFE      | RD       | 3.8~4.5        | 3        |
|                                     | SF3b49/ <i>Sap49</i> / <i>Hsh49</i>                             | ✓     | ✓      | ✓    | 424         | RRM domain I/II             | 5LSB      | RD       | 6.0~15.0       | 4        |
| SF3b14a/ <i>p14-like</i> /-         | ✓                                                               | ✓     | ✓      | 125  | RRM domain  | 5IFE                        | RD        | 3.8~4.5  | 5              |          |
| SF3b14b/ <i>Ini1</i> / <i>Rds3</i>  | ✓                                                               | ✓     | ✓      | 110  | PHF5 domain | 5IFE                        | RD        | 3.8~4.5  | 6              |          |
| SF3b10/ <i>SF3b10</i> / <i>Ysf3</i> | ✓                                                               | ✓     | ✓      | 86   | -           | 5IFE                        | RD        | 3.8~4.5  | 7              |          |
| NTC/<br>Prp19<br>Complex            | Prp19                                                           | X     | ✓      | ✓    | 504         | 3:137                       |           | RD       | 6.0~15.0       | q-t      |
|                                     | Syf1/ <i>Cwf3</i> / <i>Syf1</i>                                 | X     | ✓      | ✓    | 855         | TPR repeat                  |           | RD       | 6.0~15.0       | I        |
|                                     | Syf3/ <i>Cwf4</i> / <i>Chf1</i>                                 | ✓     | ✓      | ✓    | 848         | TPR repeat                  | 5XJC      | RD       | 5.0~15.0       | J        |
|                                     | Spf27/ <i>Cwf7</i> / <i>Snt309</i>                              | X     | ✓      | ✓    | 225         | 14:222                      |           | RD       | 6.0~15.0       | K        |
|                                     | Cdc5/ <i>Cdc5</i> / <i>Cef1</i>                                 | ✓     | ✓      | ✓    | 802         | Myb domain/-                | 5XJC      | RD       | 4.0~15.0       | L        |
| NTC Related<br>proteins             | G10/ <i>Cwf14</i> / <i>Bud31</i>                                | X     | ✓      | ✓    | 144         | 1:144                       |           | RD       | 4.0~6.0        | N        |
|                                     | RBM22/ <i>Cwf5</i> / <i>Cwf2</i><br>/ <i>Ecm2</i> / <i>Cwc2</i> | X     | ✓      | ✓    | 420         | 19:303                      |           | RD       | 4.0~6.0        | O        |
|                                     | Ad002/ <i>Cwf15</i> / <i>Cwc15</i>                              | ✓     | ✓      | ✓    | 229         | 2:78/188:229                | 5XJC      | RD       | 4.0~6.0        | P        |
|                                     | Skip/ <i>Prp45</i> / <i>Prp45</i>                               | ✓     | ✓      | ✓    | 536         | 51:316                      |           | RD       | 4.0~6.0        | R        |
|                                     | Pr11/ <i>Prp5</i> / <i>Prp46</i>                                | ✓     | ✓      | ✓    | 514         | WD40 domain                 |           | RD       | 4.0~6.0        | T        |
| IBC protein                         | Aquarius/ <i>Cwf11</i> /-                                       | X     | ✓      | ✓    | 1485        | 19:1381                     | 5XJC      | RD       | 7.0~15.0       | Q        |
| Known<br>Splicing<br>Factors        | Prp2                                                            | ✓     | ✓      | ✓    | 1061        | ATP-dependent RNA helicase  | 5GM6      | RD       | 8.0~15.0       | S        |
|                                     | RNF113A/ <i>Cwf24</i> / <i>Cwc24</i>                            | ✓     | ✓      | X    | 343         | ZF                          | 5XJC      | HM       | 4.0~6.0        | M        |
|                                     | SRm300/ <i>Cwf21</i> / <i>Cwc21</i>                             | X     | ✓      | ✓    | 2296        | 1:26                        |           | RD       | 4.0~5.0        | U        |
|                                     | Cwc22/ <i>Cwf22</i> / <i>Cwc22</i>                              | ✓     | ✓      | ✓    | 908         | MIF4G/ MA3                  |           | RD       | 4.0~10.0       | V        |
| Step II factors                     | Prp17                                                           | X     | ✓      | ✓    | 579         | NTD (83:273);WD40 (274:576) | 5XJC      | RD       | 5.0~7.0        | W        |
| RES complex                         | SNIP1/-/ <i>Pml1</i>                                            | ✓     | ✓      | ✓    | 396         | FHA domain                  |           | RD       | 4.0~6.0        | X        |
|                                     | RBMX2/ <i>Cwf29</i> / <i>Snu17</i>                              | ✓     | ✓      | ✓    | 322         | RRM domain                  | 5GM6      | RD       | 4.0~6.0        | Y        |
|                                     | Bud13/ <i>Cwf26</i> / <i>Bud13</i>                              | ✓     | ✓      | ✓    | 619         | -                           |           | RD       | 4.0~8.0        | Z        |
| PPI proteins                        | PPIL1/ <i>Cyp1</i> /-                                           | ✓     | ✓      | ✓    | 166         | PPI domain                  | 5XJC      | RD       | 4.5~8.0        | x        |
|                                     | CypE/-/-                                                        | X     | ✓      | ✓    | 301         | RRM/PPI domain              | 3MDF/2R99 | RD       | 8.0~15.0       | y        |
|                                     | NY-CO-<br>10/ <i>Cyp7</i> / <i>Cwc27</i>                        | ✓     | ✓      | X    | 472         | PPI domain                  | 4R3E      | RD       | 5.0~8.0        | z        |

Under the column labeled “Molecule”, proteins from human, *S. pombe*, and *S. cerevisiae* are colored black, red, and green, respectively. If the proteins from all three species have the same name, only a single name in black is indicated. Under the column labeled “Modeling”, HM stands for homology modelling; RD stands for rigid docking.
